# Supplementary material for: Mesostructured Bimetallic MFI Zeolite for Efficient Aromatization of Light Naphtha to BTX Aromatics
Source: Research Square preprint supplement (doi:10.21203/rs.3.rs-7408317/v1), 2025-09-03
Supplement: Supplementary file 1 [file 3ec01b8e90fd2e770584a2e1.docx]

**Mesostructured Bimetallic MFI Zeolite for Efficient Aromatization of Light Naphtha to BTX Aromatics**

Muhammad Waqas a, Tatinaidu Kella a, Ziyauddin S. Qureshi a,b *, Yaming Jin c, and Abdullah Aitani a,d, and Hassan Alasiri a,d

*a Interdisciplinary Research Center for Refining & Advanced Chemicals, King Fahd University of Petroleum & Minerals, Dhahran 31261, Saudi Arabia*

*b Chemistry Department, King Fahd University of Petroleum & Minerals, Dhahran 31261, Saudi Arabia*

*c Research & Development Center, Saudi Aramco, Dhahran 31311, Saudi Arabia*

*d Chemical Engineering Department, King Fahd University of Petroleum & Minerals, Dhahran 31261, Saudi Arabia*

** Corresponding author E-mail:* [zqureshi@kfupm.edu.sa](mailto:zqureshi@kfupm.edu.sa)


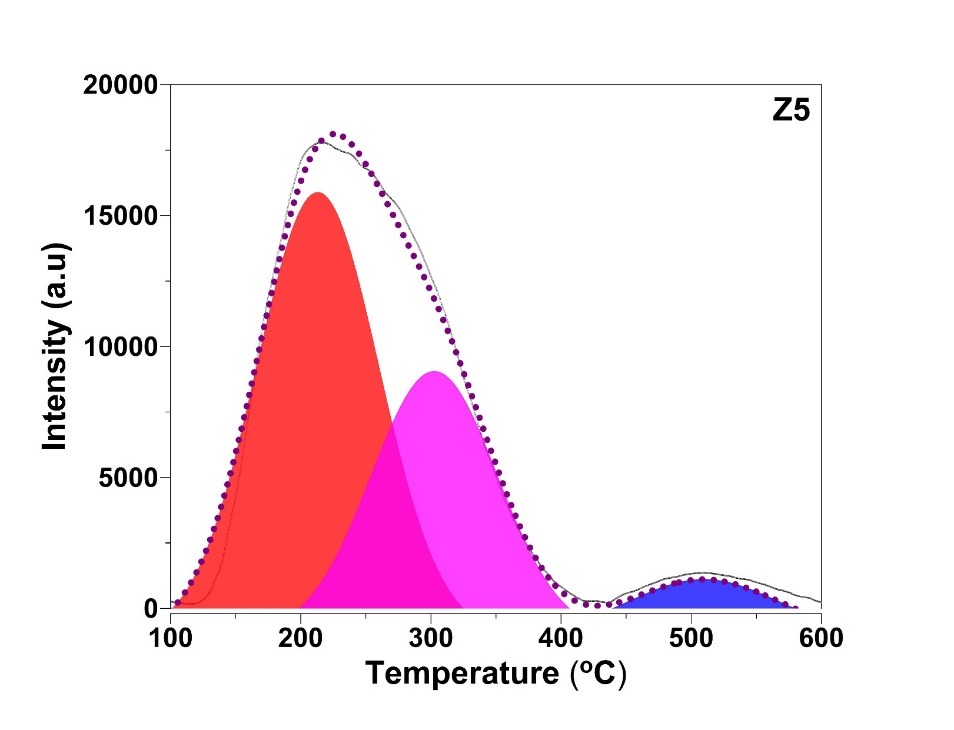


**Figure S1.** NH3-TPD profiles of parent Z5 material.


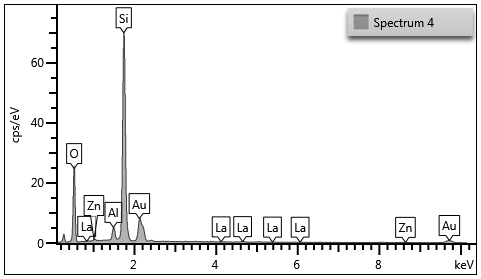


**Figure S2.** EDX spectrum of 2%La-1%Zn/Z5-AT material.


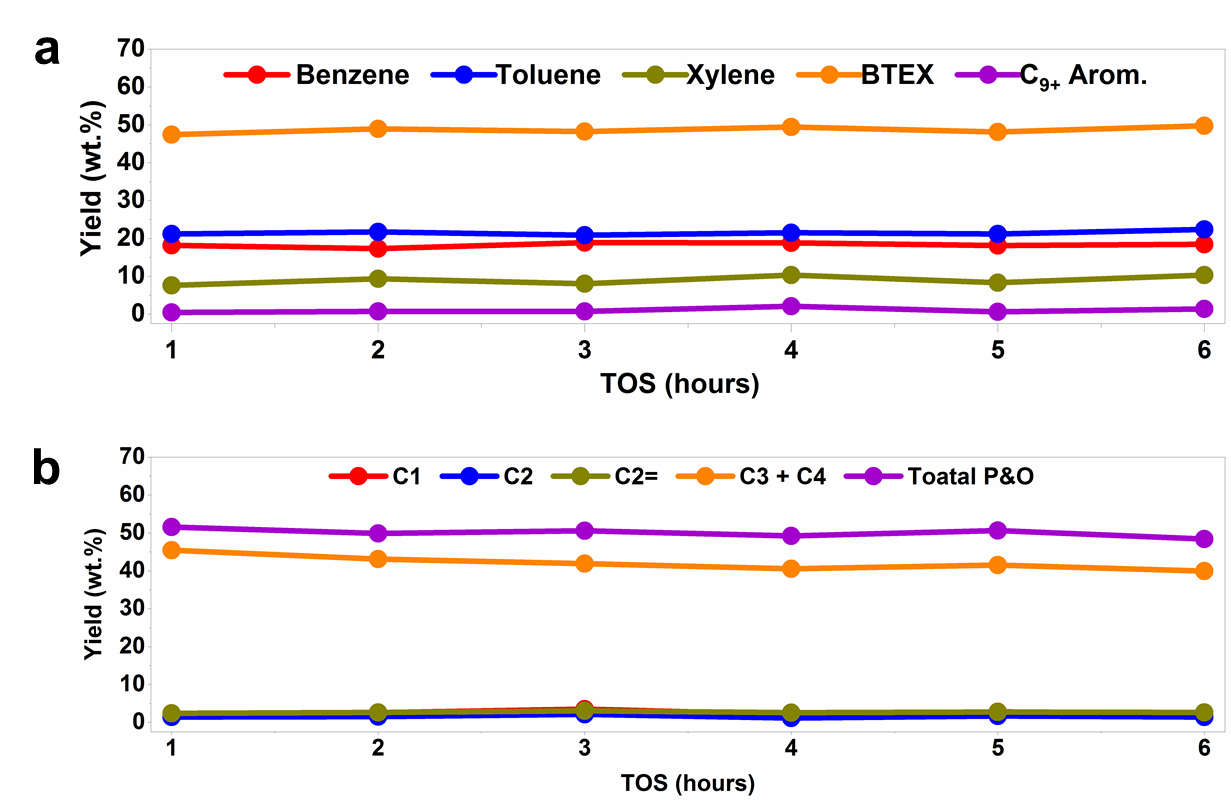


**Figure S3.** The stability test results of Z5-AT catalysts sample; (a) liquid yield stability, (b) gas yield stability.

**Table S1. The acid quantities of several zeolite samples as calculated from NH3-TPD profiles.**

| **Catalyst** | **Amount NH3 desorbed (mmol/g)** | | |
| --- | --- | --- | --- |
| **I**  **100-350 oC** | **II**  **Above 350 oC** | **Total** |
| Z5 | 0.280 | 0.038 | 0.318 |
| Z5-AT | 0.230 | 0.075 | 0.305 |
| 1%Zn/Z5-AT | 0.202 | 0.059 | 0.261 |
| 2%La/Z5-AT | 0.195 | 0.067 | 0.262 |
| 2%La-1%Zn/Z5-AT | 0.233 | 0.071 | 0.304 |

**Table S2. Comparative analysis of literature on bifunctional materials for naphtha catalytic aromatization**

| **Sr no.** | **Catalyst** | **Feed** | **Reaction conditions** | | | **Aromatic yield**  **(wt. %)** | **ref** |
| --- | --- | --- | --- | --- | --- | --- | --- |
| **Temperature**  **(oC)** | **Pressure**  **(MPa)** | **WHSV**  **(h-1)** |
| 1 | Zn-Ga/ZSM-5 | light naphtha | 500 | 0.1 | 1 | 64.8 | 1 |
| 2 | Pt-Zn/ZSM-5 | light naphtha (C5-C7) + C1 | 400 | 3 | 1 | 56.1 | 2 |
| 3 | Ni/ZSM-5 | Heavy naphtha (C6-C14) | 450 | 0.5 | 1 | 68.8 | 3 |
| 4 | Ga/H-ZSM-5 (desilicated) | full-range naphtha | 550 | 0.1 | 6 | 59.2 | 4 |
| 5 | Ag-Ga/ZSM-5 | Full range naphtha | 550 | 1 |  | 67.2 | 5 |
| 6 | Pd/Al2O3 | bionaphtha | 375 | 0.5 |  | 72.7 | 6 |
| 7 | Pt/Ce-Y | hydrofined naphtha | 490 | 0.7 | 2 | 42.8 | 7 |
| 8 | Ni-Mo/Al2O3-HZSM-5 | FCC naphtha | 420 | 1.5 | 2 | 35.3 | 8 |
| 9 | Zn-P/ZSM-5 | FCC naphtha (75-120 oC) | 470 | 0.1 | 1 | 39.9 | 9 |
| 10 | 2%La-1%Zn/Z5-AT | light naphtha | 550 | 1 | 1 | 72.7 | This work |

**References**

1. Hodala, J. L.; Halgeri, A. B.; Shanbhag, G. V.; Reddy, R. S.; Choudary, N. V.; Rao, P. V. C.; SriGanesh, G.; Shah, G.; Ravishankar,R. Aromatization of C5-rich Light Naphtha Feedstock over Tailored Zeolite Catalysts: Comparison with Model Compounds (n-C5-n-C7). ChemistrySelect **2016**, 1, 2515−2521.
2. Jarvis, J.; He, P.; Wang, A.; Song, H. Pt-Zn/HZSM-5 as a highlyselective catalyst for the Co-aromatization of methane and lightstraight run naphtha. Fuel **2019**, 236, 1301−1310.
3. Sharifi, K.; Halladj, R.; Royaee, S. J.; Nasr, M. R. J. A newapproach for gasoline upgrading: Coupling octane enhancement anddesulfurization of heavy straight-run naphtha over Ni/HZSM-5catalyst. Catal. Comm. **2018**, 115, 31−35.
4. Ummer, A. C.; Akhtar, M. N.; Alnaimi, E.; Ding, L.; Alasiri, H.S. Aromatization of Commercial Full Range Naphtha Over ModifiedHierarchical ZSM-5 Catalyst. ChemistrySelect **2021**, 6, 11541−11550.
5. Ummer, Aniz Chennampilly, et al. "Understanding the Promotional Effect of Silver in Naphtha Reforming over a Ga/ZSM-5 Catalyst to Enhance Liquid Yield." The Journal of Physical Chemistry C, **2024**, 128.5: 1971-1981.
6. Mishra, A.; Ali, S. S.; Verma, V.; Farooqui, S. A.; Sinha, A. K.Dehydro-aromatization of renewable bio-naphtha over Pd/γ-Al2O3catalyst. Fuel **2022**, 325, 124883−124892.
7. Zhang, P.; Yang, Y.; Li, Z.; Liu, B.; Hu, C. Preparation,characterization and naphtha aromatization performance of thecatalytic reforming catalyst Pt/MY (M = Mg, Ba or Ce). Catal.Today **2020**, 353, 146−152.
8. Wan, H.; Zhang, R.; Qin, Y.; Lu, C.; Zhang, X.; Song, L.Morphology control and aromatization of ZSM-5/KL compositezeolite. J. Petrochem. Univ. **2015**, 28, 1−6.
9. Zhao, L.; Zhu, J.; Wang, H. Y.; Wei, M.; Ma, J.; Bai, Y. Z.Aromatization of FCC gasoline over modified HZSM-5 catalyst. Pet.Sci. Technol. **2007**, 25, 577−584.
